# Supplementary material for: RNA m6A Demethylase ALKBH5 Protects Against Pancreatic Ductal Adenocarcinoma via Targeting Regulators of Iron Metabolism
Source: PubMed Central journal article supplement (PMC8558440; doi:10.3389/fcell.2021.724282), 2021-10-18
Supplement: Data_Sheet_1.pdf [file Data_Sheet_1.pdf]

## Supplementary Materials

Supplementary Figures S1-S7 and figure legends.

Supplementary Table S1. List of antibodies used in this study.

Supplementary Table S2. List of primers used in this study.

Supplementary Tables S3-9 (see attached excel files).

Table S3. Summary of sequencing information, data processing, gene expression, and methylation analysis.

Table S4. Differential m<sup>6</sup>A peaks between ALKBH5-overexpression (OE) and empty vector (EV) samples in poly(A) RNA-based m<sup>6</sup>A-seq data and GO analysis of the protein-coding genes harboring differential methylation.

Table S5. Results of differential expression analysis in poly(A) RNA-based m<sup>6</sup>A-seq data.

Table S6. Results of differential methylation analysis in total RNA-based m<sup>6</sup>A-seq data.

Table S7. Results of differential expression analysis in total RNA-based m<sup>6</sup>A-seq data.

Table S8. Results of differential alternative splicing analysis in poly(A) RNA-based m<sup>6</sup>A-seq data.

Table S9. Results of differential alternative splicing analysis in total RNA-based m<sup>6</sup>A-seq data.

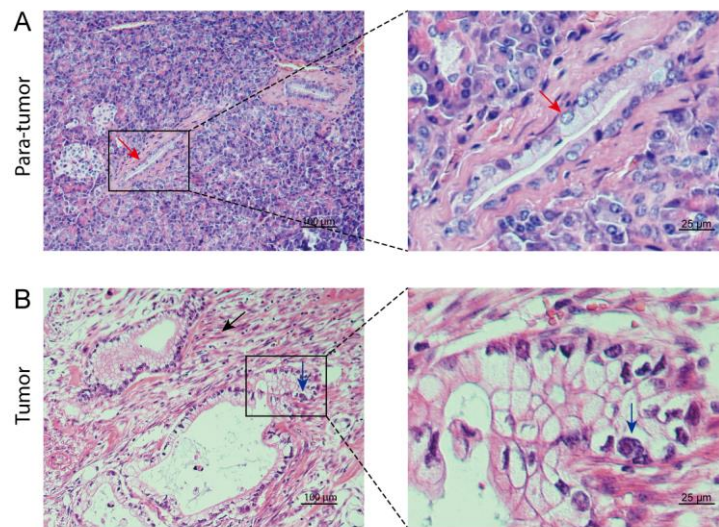

**Supplementary Figure S1 Representative images of H&E analysis of para-tumor (A) and tumor (B) samples of PDAC patients.** Red arrows indicate normal ductal epithelial cells, blue arrows indicate tumor cells, while black arrows indicate stromal cells. Enlarged images in the rectangle are shown in the right panel. Scale bars, 100  $\mu\text{m}$  and 25  $\mu\text{m}$ , respectively.

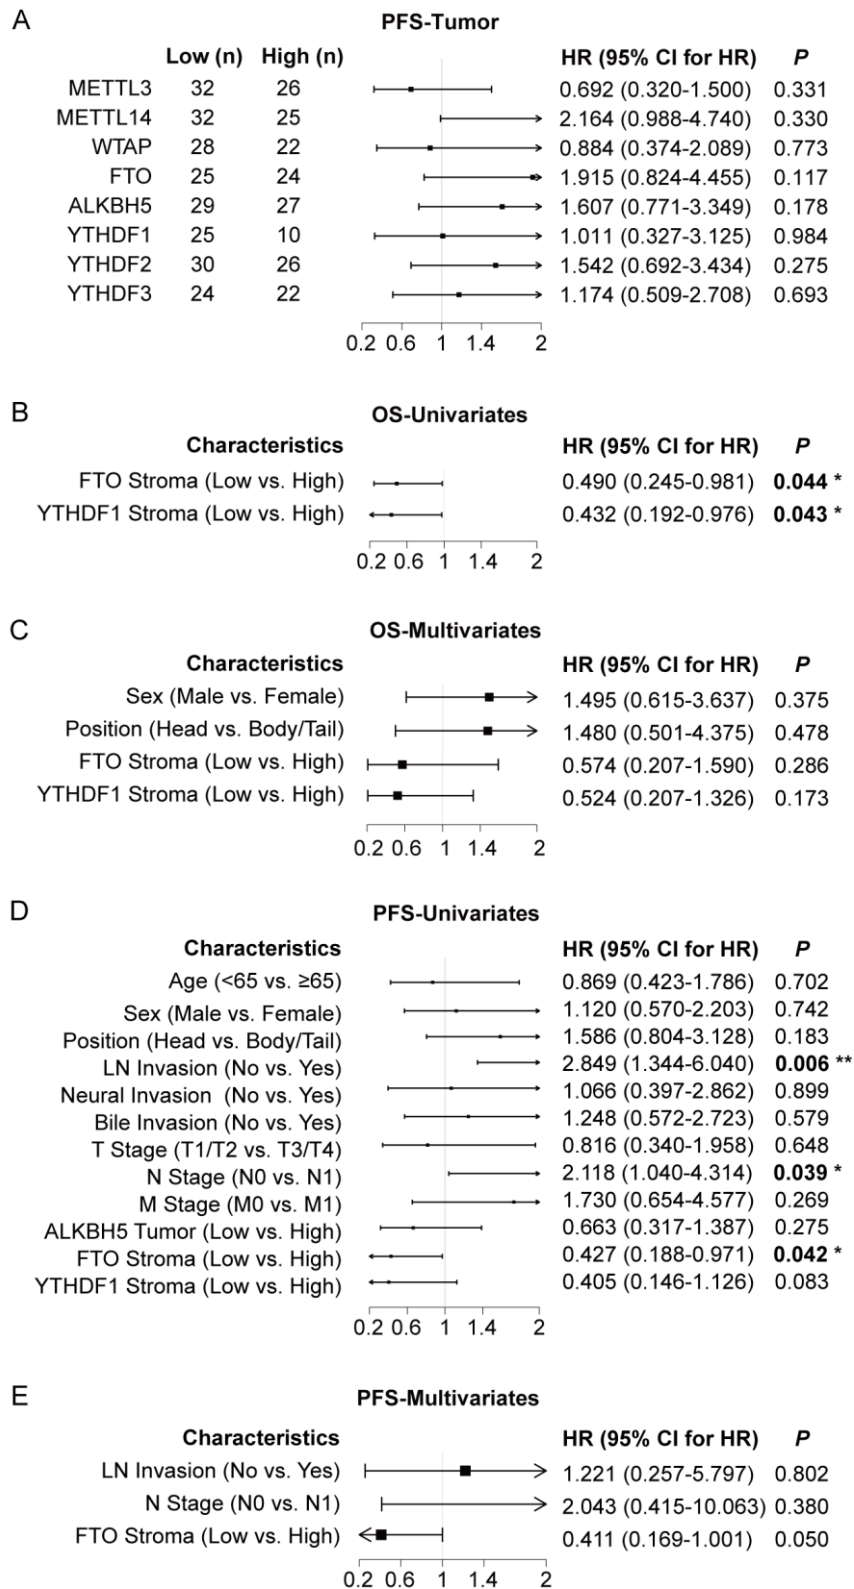

**Supplementary Figure S2 Survival analysis for the expression levels of m<sup>6</sup>A regulators and risk factors of PDAC.** (A) Log-rank analysis showing the correlation between the expression of m<sup>6</sup>A regulators in tumors and progression-free survival (PFS). (B, C) Cox regression analysis for overall survival (OS) in PDAC patients. (D, E) Cox regression analysis for PFS in PDAC patients. \*  $P < 0.05$ , \*\*  $P < 0.01$ .

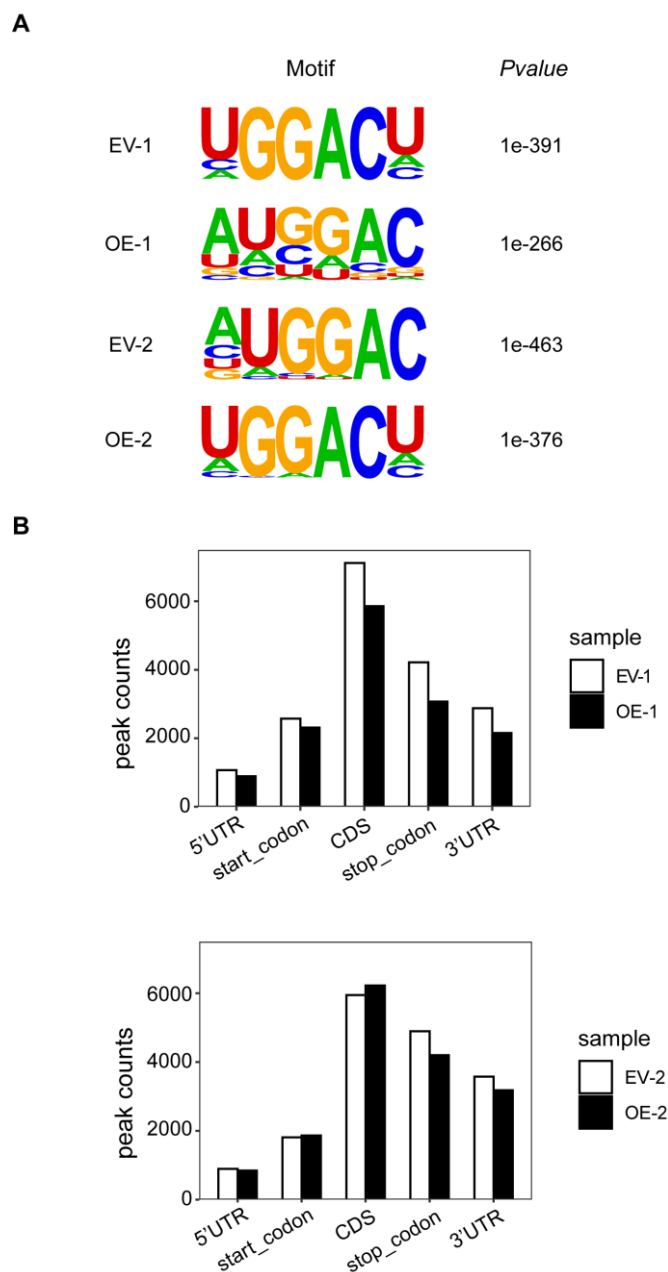

**Supplementary Figure S3 Distribution of m<sup>6</sup>A peaks in two sets of total RNA-based m<sup>6</sup>A-seq in MIA PaCa-2 cells.** (A) Top consensus sequences of all enriched motifs for m<sup>6</sup>A peaks identified in empty control (EV) and ALBKH5 overexpression (OE) groups. (B) Bar graph showing the distribution of m<sup>6</sup>A peak in different regions along the mRNA transcript.

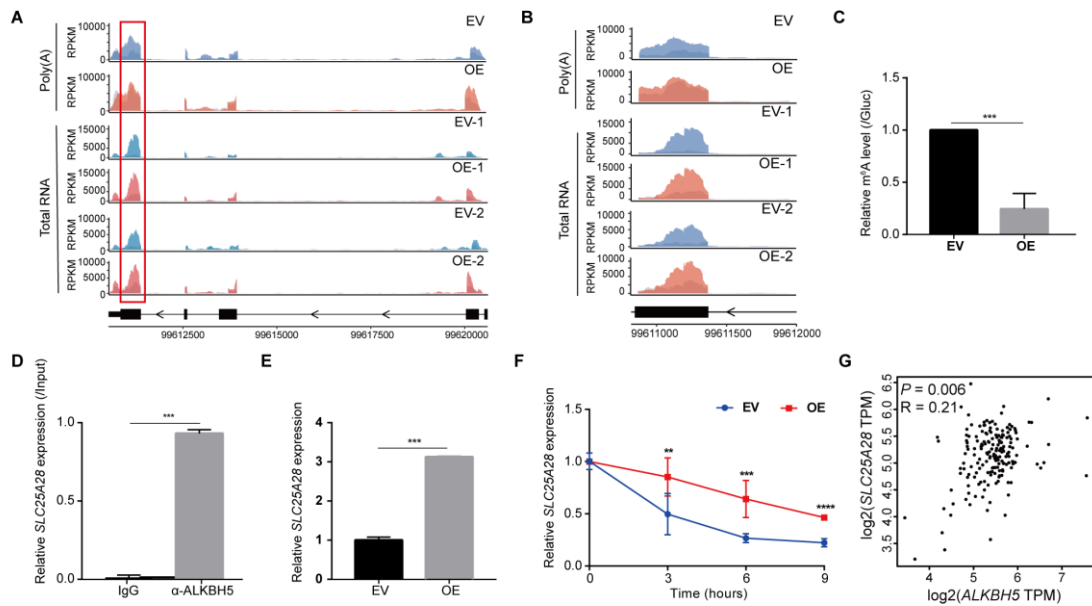

**Supplementary Figure S4 ALKBH5 regulates the stability of *SLC25A28* RNA in MIA PaCa-2 cells.** (A) Sequencing reads density for input and m<sup>6</sup>A-IP samples along *SLC25A28* transcript in poly(A) RNA- and total RNA-based m<sup>6</sup>A-seq data. Hypomethylated peaks are indicated in red rectangles. Grey for input libraries, while blue (EV) or red (OE) for IP libraries. EV, empty vector; OE, ALKBH5 overexpression. X-axis, genomic coordinates; Y-axis, normalized number of reads. (B) Zoom-in of the hypomethylated region on *SLC25A28* transcript. (C) m<sup>6</sup>A-IP-qPCR results showing the methylation changes of *SLC25A28* between EV and OE samples. (D) RIP-qPCR results showing the interaction between ALKBH5 protein and *SLC25A28* RNA. (E) RT-qPCR results showing the changes of *SLC25A28* expression between EV and OE samples. (F) Results of RNA stability assay showing the effect of ALKBH5 overexpression on the rate of *SLC25A28* RNA decay. (G) Correlation of RNA expression between *ALKBH5* and *SLC25A28* across 178 pancreatic adenocarcinoma (PAAD) samples in TCGA database. R, Pearson correlation coefficient. \*\*  $P < 0.01$ , \*\*\*  $P < 0.001$ , \*\*\*\*  $P < 0.0001$ .

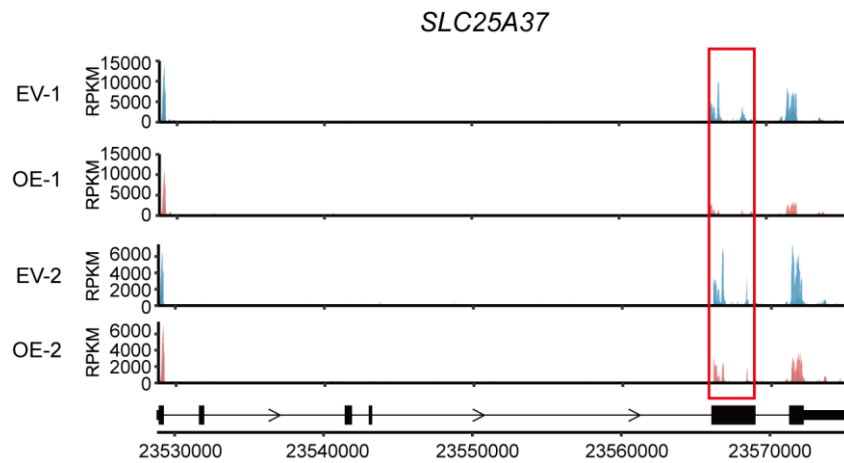

**Supplementary Figure S5 Reads density plots showing m<sup>6</sup>A methylation level of *SLC25A37* identified in two sets of total RNA-based m<sup>6</sup>A-seq data.** Sequencing reads density for input and m<sup>6</sup>A-IP samples along *SLC25A28* transcript in poly(A) RNA- and total RNA-based m<sup>6</sup>A-seq data. Hypo-methylated peaks are indicated in red rectangles. Grey for input libraries, while blue (EV) or red (OE) for IP libraries. EV, empty vector; OE, ALKBH5 overexpression. X-axis, genomic coordinates; Y-axis, normalized number of reads.

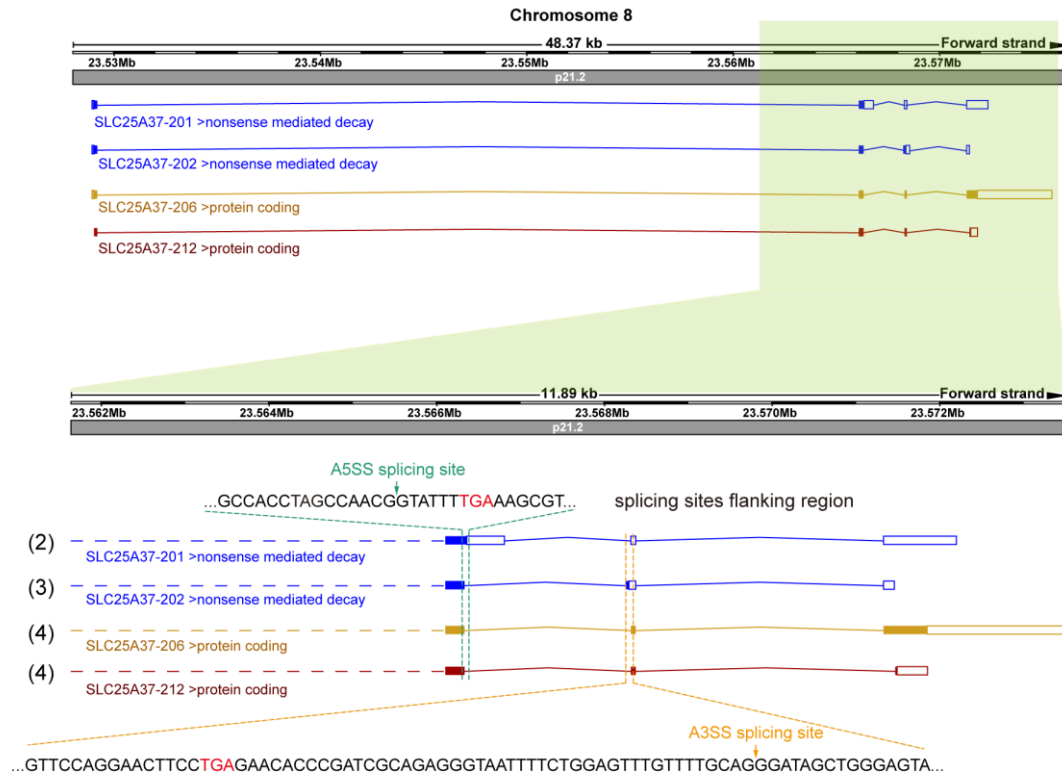

**Supplementary Figure S6 Diagram showing *SLC25A37* isoforms resulting from alternative splicing.** Overall display (upper panel) and zoom-in (lower panel) of the alternatively spliced regions on *SLC25A37* transcript were shown. (2), (3), and (4) correspond to the PCR products detected in Figure 5E and 5H. Part of cDNA sequences of the splicing variants (2) and (3) are shown to highlight the positions of splicing sites and the stop codon TGA present in the retained introns.



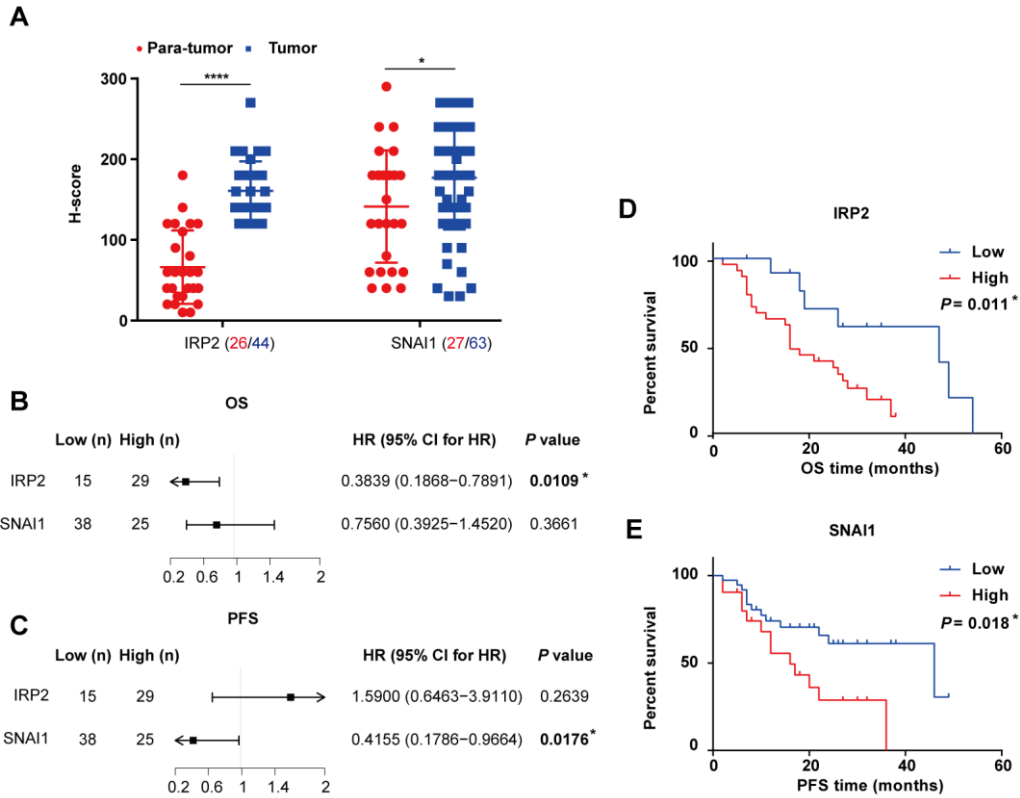

**Supplementary Figure S7 *In situ* protein expression and survival analysis of IRP2 and SNAI1 in tumor samples of PDAC.** (A) Scatter plots showing the H-scores of IRP2 and SNAI1 in para-tumor and tumor cells. Case numbers are shown in brackets, red for para-tumor and blue for tumor. (B, C) Log-rank analysis showing the correlation between overall survival (OS) or progression-free survival (PFS) and the expression of IRP2 and SNAI1 in tumor cells. (D, E) Kaplan-Meier survival curves for OS or PFS of IRP2 and SNAI1 protein expression. \*  $P < 0.05$ , \*\*\*\*  $P < 0.0001$ .

**Table S1 List of antibodies used in this study.**

| <b>Antibody Name</b>                             | <b>Source</b> | <b>Catalog No.</b> | <b>Application</b>  | <b>Dilution ratio</b>                       |
|--------------------------------------------------|---------------|--------------------|---------------------|---------------------------------------------|
| anti-GAPDH                                       | ZSGB-BIO      | TA-08              | WB                  | 1: 1000                                     |
| Anti-β-Actin                                     | Santa cruz    | Sc-47778           | WB                  | 1: 1000                                     |
| anti-ALKBH5                                      | Proteintech   | 16837-1-AP         | WB, RIP,<br>IHC     | WB: 1:1000,<br>RIP: variable,<br>IHC: 1:500 |
| anti-FTO                                         | Proteintech   | 27226-1-AP         | IHC                 | IHC: 1:500                                  |
| anti-METTTL3                                     | Proteintech   | 15073-1-AP         | IHC                 | IHC: 1:500                                  |
| anti-METTTL14                                    | Abcam         | ab220030           | IHC                 | IHC: 1:500                                  |
| anti-WTAP                                        | Proteintech   | 60188-1-Ig         | IHC                 | IHC: 1:500                                  |
| anti-YTHDF1                                      | Proteintech   | 17479-1-AP         | IHC                 | IHC: 1:500                                  |
| anti-YTHDF2                                      | MBL           | RN123PW            | IHC                 | IHC: 1:100                                  |
| anti-YTHDF3                                      | Abcam         | ab103328           | IHC                 | IHC: 1:500                                  |
| Rabbit polyclonal to m <sup>6</sup> A            | Abcam         | ab151230           | m <sup>6</sup> A-IP | Variable                                    |
| Rabbit Flag mAb (D6W5B)                          | CST           | 14793S             | m <sup>6</sup> A-IP | Variable                                    |
| Rabbit (DA1E) mAb IgG                            | CST           | 3900               | m <sup>6</sup> A-IP | Variable                                    |
| Mouse Anti-rabbit IgG                            | CST           | 5127               | RIP                 | Variable                                    |
| Anti-SLC25A37                                    | Proteintech   | 26469-1-AP         | WB                  | 1:500                                       |
| Anti-SLC25A28                                    | Bioss         | Bs-7157R           | WB                  | 1:500                                       |
| Anti-FBXL5                                       | Solarbio      | K107646P           | WB                  | 1:5000                                      |
| Anti-IRP2                                        | Proteintech   | 23829-1-AP         | WB                  | 1:400                                       |
| Anti-SNAI1                                       | CST           | 3879               | WB                  | 1:1000                                      |
| Anti-SNAI1                                       | Solarbio      | K003876P           | IHC                 | 1:100                                       |
| Anti-E-cadherin                                  | CST           | 3195               | WB                  | 1:1000                                      |
| Anti-N-cadherin                                  | CST           | 13116              | WB                  | 1:1000                                      |
| Peroxidase-Conjugated Goat anti-Rabbit IgG (H+L) | ZSGB-BIO      | ZB-2301            | WB                  | 1:1000                                      |
| Peroxidase-Conjugated Goat anti-Mouse IgG (H+L)  | ZSGB-BIO      | ZB-2305            | WB                  | 1:1000                                      |

**Table S2 List of primers used in this study.**

| <b>Primers</b>           | <b>Sequence (5'→3')</b> |
|--------------------------|-------------------------|
| <i>Gluc</i> F            | CGACATTCCTGAGATTCCTGG   |
| <i>Gluc</i> R            | TTGAGCAGGTCAGAACACTG    |
| <i>Cluc</i> F            | GCTTCAACATCACCGTCATTG   |
| <i>Cluc</i> R            | CACAGAGGCCAGAGATCATTC   |
| <i>FBXL5</i> F           | ACCACAATACGCAAAGGCTG    |
| <i>FBXL5</i> R           | GTTGTTCCACCTCTGGTTGT    |
| <i>SLC25A28</i> F        | CAAACGTCCAGTGGGGTTGT    |
| <i>SLC25A28</i> R        | TAACCCCCAGAGACGGTACA    |
| <i>18S</i> F             | CATTCGAACGTCTGCCCTAT    |
| <i>18S</i> R             | GTTTCTCAGGCTCCCTCTCC    |
| <i>SLC25A37</i> Peak 1 F | GAGTCCAGATCCCAAAGCCC    |
| <i>SLC25A37</i> Peak 1 R | TGATCATGACGTTGACGCCT    |
| <i>SLC25A37</i> Peak 2 F | GAGAACACCCGATCGCAGAG    |
| <i>SLC25A37</i> Peak 2 R | TCATTACCGCATCGTGGAGC    |
| <i>SLC25A37</i> AS F     | TCTACGGAGCCCTCAAGAAA    |
| <i>SLC25A37</i> AS R     | TGGCCATACTCCCAGCTATC    |

F: forward primer  
R: reverse primer
