# Supplementary material for: RNA m6A Demethylase ALKBH5 Protects Against Pancreatic Ductal Adenocarcinoma via Targeting Regulators of Iron Metabolism
Source: Front Cell Dev Biol. 2021 Oct 18;9:724282. doi: 10.3389/fcell.2021.724282 (PMC8558440; doi:10.3389/fcell.2021.724282)
Supplement: Supplementary file 4 [file Table_3.XLSX]

## Sheet: poly(A)RNA_up
Table S5 Up-regulated mRNAs in ALKBH5-overexpressing cells compared with control cells with criteria of logFC >0.58 & Pvalue <0.05 in poly(A) RNA m6A-seq data.
chr	start	end	gene_name	GeneID	gene_type	logFC	logCPM	PValue	OE_rpkm	EV_rpkm
19	43646095	43670547	PLAUR	ENSG00000011422	protein_coding	1.37596	4.74653	0.00179965	8.64173	3.32798
19	10416773	10469631	PDE4A	ENSG00000065989	protein_coding	1.0293	2.27387	0.0491311	0.941383	0.460317
15	73051710	73305206	NEO1	ENSG00000067141	protein_coding	2.02931	3.9536	1.34369e-05	3.03495	0.742372
19	57571566	57578927	ZNF416	ENSG00000083817	protein_coding	1.09202	2.58258	0.032467	3.09188	1.44795
7	134442350	134459284	AKR1B1	ENSG00000085662	protein_coding	0.846794	6.43584	0.0434763	30.342	16.8693
19	39412585	39428415	PLEKHG2	ENSG00000090924	protein_coding	0.990465	5.17698	0.0211683	5.20661	2.61993
17	18183078	18209954	ALKBH5	ENSG00000091542	protein_coding	2.57548	8.5223	3.50079e-09	197.322	33.1007
16	58462846	58513628	NDRG4	ENSG00000103034	protein_coding	1.30403	5.78591	0.00230163	8.11684	3.28653
15	68578969	68727806	CORO2B	ENSG00000103647	protein_coding	3.61328	1.96757	7.77869e-08	1.73605	0.139127
19	45379634	45406349	PPP1R13L	ENSG00000104881	protein_coding	1.13886	1.72376	0.0459313	0.854789	0.386885
19	41877120	41881372	CD79A	ENSG00000105369	protein_coding	3.09168	-0.580223	0.0348666	0.58537	0.06168
7	16753535	16784536	TSPAN13	ENSG00000106537	protein_coding	1.45456	1.28834	0.0266824	1.49448	0.541891
10	95237572	95291024	PDLIM1	ENSG00000107438	protein_coding	1.03357	5.80293	0.0151713	33.4006	16.3134
10	89213569	89414557	LIPA	ENSG00000107798	protein_coding	0.903076	7.51441	0.0301105	48.4802	25.9234
17	40015361	40017813	CSF3	ENSG00000108342	protein_coding	0.997331	3.42459	0.0324143	6.34098	3.17369
4	140620765	140756120	TBC1D9	ENSG00000109436	protein_coding	1.29104	2.71679	0.0108231	1.62259	0.661825
11	88293592	88337787	CTSC	ENSG00000109861	protein_coding	2.74499	4.61307	5.05056e-09	3.70622	0.551961
12	52948871	52952901	KRT18	ENSG00000111057	protein_coding	0.995784	9.82631	0.0163385	375.717	188.406
6	138161921	138344663	ARFGEF3	ENSG00000112379	protein_coding	1.01646	5.83464	0.0164602	5.11881	2.52996
2	216632828	216664436	IGFBP2	ENSG00000115457	protein_coding	1.01906	2.53494	0.0466687	1.57904	0.77789
1	34865436	34929585	DLGAP3	ENSG00000116544	protein_coding	1.20895	3.48975	0.00961058	3.88372	1.67834
1	68098473	68233120	WLS	ENSG00000116729	protein_coding	2.26738	3.09447	7.19518e-06	3.10617	0.643065
1	200027602	200177424	NR5A2	ENSG00000116833	protein_coding	0.950566	4.76001	0.0289116	4.6945	2.42831
1	39678648	39691689	HPCAL4	ENSG00000116983	protein_coding	2.15488	2.70179	3.56682e-05	2.08831	0.467075
1	46175073	46185958	TSPAN1	ENSG00000117472	protein_coding	1.53557	5.74615	0.000359168	33.6323	11.5979
2	215942805	216034096	MREG	ENSG00000118242	protein_coding	1.31227	3.78064	0.00442589	6.33372	2.54818
4	15604539	15681679	FBXL5	ENSG00000118564	protein_coding	1.11221	4.7071	0.0106741	7.75983	3.58819
10	89327894	89340971	IFIT3	ENSG00000119917	protein_coding	1.27236	3.04551	0.00936849	4.3324	1.79089
3	172505508	172523507	TNFSF10	ENSG00000121858	protein_coding	1.81435	1.64153	0.0034764	1.32294	0.373703
12	26120026	26125127	BHLHE41	ENSG00000123095	protein_coding	1.15355	2.02548	0.035924	1.36186	0.61052
19	45485289	45497061	RTN2	ENSG00000125744	protein_coding	1.20217	4.65948	0.00636822	10.8082	4.69538
7	131500262	131558217	PODXL	ENSG00000128567	protein_coding	0.949012	8.72837	0.0222183	81.2601	42.0909
14	54842008	54902852	GCH1	ENSG00000131979	protein_coding	1.88931	1.59667	0.00264123	1.52383	0.408392
1	203167811	203175813	MYBPH	ENSG00000133055	protein_coding	2.46214	-0.299699	0.041032	0.595748	0.10272
12	85874295	85882992	NTS	ENSG00000133636	protein_coding	1.04246	3.2757	0.0275929	8.23546	3.99437
18	36297714	36780055	FHOD3	ENSG00000134775	protein_coding	1.05326	4.21483	0.0183934	3.11742	1.50144
12	121019111	121039242	OASL	ENSG00000135114	protein_coding	2.54826	3.28009	4.9606e-07	4.64185	0.790774
6	136342281	136550819	MAP7	ENSG00000135525	protein_coding	1.26118	2.54888	0.0139994	1.47165	0.612701
9	124853417	124857890	WDR38	ENSG00000136918	protein_coding	3.09168	-0.580223	0.0348666	0.634327	0.0668386
12	57755098	57760407	MARCH9	ENSG00000139266	protein_coding	1.0035	3.14048	0.0346828	2.88022	1.43513
17	39737927	39747291	GRB7	ENSG00000141738	protein_coding	1.81565	3.95192	8.99286e-05	6.63126	1.88142
1	84078062	84238498	PRKACB	ENSG00000142875	protein_coding	1.30455	1.54658	0.0262297	0.581021	0.234173
1	163111121	163321791	RGS5	ENSG00000143248	protein_coding	0.921962	6.46051	0.0281683	16.8685	8.90219
3	61561569	62297613	PTPRG	ENSG00000144724	protein_coding	0.912723	3.59385	0.0494247	1.0625	0.564
3	108380369	108529322	MYH15	ENSG00000144821	protein_coding	2.44316	2.7561	3.74061e-06	1.44844	0.265078
5	38845858	38945596	OSMR	ENSG00000145623	protein_coding	0.837407	6.692	0.0454775	18.4503	10.325
5	68215720	68301821	PIK3R1	ENSG00000145675	protein_coding	0.947627	3.17101	0.0457859	1.08044	0.559657
6	82363206	82370828	TPBG	ENSG00000146242	protein_coding	1.00065	3.65096	0.0310291	2.39295	1.19507
6	83512538	83525704	PRSS35	ENSG00000146250	protein_coding	3.49441	1.32416	4.66319e-06	1.76283	0.151976
11	134331874	134378341	GLB1L2	ENSG00000149328	protein_coding	1.49434	2.02792	0.00695566	0.79226	0.280153
6	127968779	128520674	PTPRK	ENSG00000152894	protein_coding	1.29461	3.56868	0.00551578	1.84652	0.751941
4	169094256	169271105	SH3RF1	ENSG00000154447	protein_coding	1.32951	1.97479	0.0165489	0.956014	0.379128
10	99610522	99620609	SLC25A28	ENSG00000155287	protein_coding	1.00833	5.25361	0.0188922	28.9093	14.368
10	76869601	77638595	KCNMA1	ENSG00000156113	protein_coding	0.867024	4.89548	0.045298	1.94064	1.06374
10	69220303	69267559	HKDC1	ENSG00000156510	protein_coding	2.51569	3.10407	9.22546e-07	3.37409	0.587705
5	139846779	140043299	NRG2	ENSG00000158458	protein_coding	3.12361	1.01335	7.62932e-05	0.735339	0.0820399
1	19665287	19679562	HTR6	ENSG00000158748	protein_coding	0.920066	4.10496	0.0404014	11.2341	5.93425
1	161184308	161199056	ADAMTS4	ENSG00000158859	protein_coding	0.907927	4.24646	0.0396643	2.37439	1.26489
8	23841915	23854807	STC1	ENSG00000159167	protein_coding	4.56508	2.58705	9.51364e-12	2.70958	0.11172
16	67666816	67668758	C16orf86	ENSG00000159761	protein_coding	1.89771	0.369225	0.0333763	0.983579	0.259097
1	162631373	162787400	DDR2	ENSG00000162733	protein_coding	1.18977	6.59854	0.00476302	12.5362	5.49491
1	158999968	159055155	IFI16	ENSG00000163565	protein_coding	2.88538	3.61469	9.95874e-09	4.0255	0.542852
1	159062484	159147096	AIM2	ENSG00000163568	protein_coding	3.96461	1.73567	7.07894e-08	2.96822	0.18458
5	10564330	10657816	ANKRD33B	ENSG00000164236	protein_coding	1.33267	3.08746	0.00643027	1.21909	0.483283
7	20782283	20786886	SP8	ENSG00000164651	protein_coding	2.24924	0.616526	0.00528628	0.604735	0.124671
12	52897187	52949954	KRT8	ENSG00000170421	protein_coding	1.02837	10.9809	0.0131275	394.153	193.238
2	26692690	26733420	KCNK3	ENSG00000171303	protein_coding	1.75252	2.01247	0.00151258	0.958246	0.283046
17	41523617	41528308	KRT19	ENSG00000171345	protein_coding	1.12016	6.78228	0.00768474	64.4458	29.645
17	41513743	41522529	KRT15	ENSG00000171346	protein_coding	1.27452	3.36801	0.00661745	2.01801	0.833187
11	73264505	73298617	P2RY6	ENSG00000171631	protein_coding	4.84784	1.62772	6.45278e-09	1.42603	0.0466323
11	45648877	45665622	CHST1	ENSG00000175264	protein_coding	6.24591	3.89233	1.17021e-20	8.34783	0.106619
1	42807052	42817252	SVBP	ENSG00000177868	protein_coding	1.22269	1.56958	0.0361572	3.23698	1.38137
17	8120590	8124092	HES7	ENSG00000179111	protein_coding	1.18627	1.54582	0.0425719	2.04096	0.893304
14	44897295	44907257	C14orf28	ENSG00000179476	protein_coding	1.8672	0.938513	0.00973082	0.708382	0.191936
1	32247233	32248856	FAM167B	ENSG00000183615	protein_coding	1.17574	1.68147	0.0405677	4.49096	1.98088
3	38548057	38649673	SCN5A	ENSG00000183873	protein_coding	1.23221	2.2755	0.01901	0.653859	0.277643
15	90160604	90229679	SEMA4B	ENSG00000185033	protein_coding	0.986066	5.80734	0.0200341	10.5905	5.34583
12	64264762	64391192	C12orf56	ENSG00000185306	protein_coding	1.83924	1.92415	0.00123927	1.03014	0.286335
16	11254405	11256179	SOCS1	ENSG00000185338	protein_coding	1.33996	1.92094	0.0164527	4.22948	1.66491
10	89392546	89406486	IFIT1	ENSG00000185745	protein_coding	1.22223	3.01106	0.0126632	2.39465	1.02492
2	68041130	68110948	C1D	ENSG00000197223	protein_coding	1.03328	2.3973	0.0460164	1.91091	0.93197
4	182143987	182803024	TENM3	ENSG00000218336	protein_coding	1.2821	3.45923	0.0061533	1.2808	0.526074
3	45224466	45226278	TMEM158	ENSG00000249992	protein_coding	1.29214	5.81074	0.00249961	43.8369	17.8967
7	106656765	106660996	CCDC71L	ENSG00000253276	protein_coding	0.883373	4.41136	0.0458347	6.46784	3.50492
19	52031379	52095738	ZNF432	ENSG00000256087	protein_coding	1.19222	2.46288	0.0209254	1.24136	0.542135
10	47365496	47384273	ZNF488	ENSG00000265763	protein_coding	1.81669	3.38601	0.000178227	4.58584	1.29936
1	145992435	145996600	TXNIP	ENSG00000265972	protein_coding	1.56144	5.40277	0.00032409	17.367	5.88198
17	81395475	81466332	BAHCC1	ENSG00000266074	protein_coding	1.58319	3.29482	0.00104663	1.07385	0.357802
1	205976740	206003461	RAB7B	ENSG00000276600	protein_coding	1.24843	2.14064	0.0190443	1.61779	0.679066

## Sheet: poly(A)RNA_down
Table S5 Down-regulated mRNAs in ALKBH5-overexpressing cells compared with control cells with criteria of logFC <-0.58 & Pvalue <0.05 in poly(A) RNA m6A-seq data.
chr	start	end	gene_name	GeneID	gene_type	logFC	logCPM	PValue	OE_rpkm	EV_rpkm
7	43112599	43566001	HECW1	ENSG00000002746	protein_coding	-1.05731	3.23229	0.0262965	0.427008	0.889544
11	68008578	68029282	ALDH3B1	ENSG00000006534	protein_coding	-1.04113	4.98866	0.0163201	3.11299	6.40793
8	48917690	48921740	SNAI2	ENSG00000019549	protein_coding	-7.87528	0.678921	7.40189e-07	0	1.21873
7	18086949	19002416	HDAC9	ENSG00000048052	protein_coding	-1.15227	3.69743	0.0119691	0.470571	1.04677
2	32946972	33399509	LTBP1	ENSG00000049323	protein_coding	-1.09585	2.12092	0.0484199	0.360135	0.771594
9	120902393	120929173	TRAF1	ENSG00000056558	protein_coding	-1.07495	2.65173	0.0316989	0.606338	1.27938
9	105244622	105439171	SLC44A1	ENSG00000070214	protein_coding	-1.37588	5.6169	0.00139589	2.2327	5.79597
7	97852118	97872542	ASNS	ENSG00000070669	protein_coding	-1.0545	5.4977	0.013562	6.561	13.63
7	24796539	24981634	OSBPL3	ENSG00000070882	protein_coding	-0.906184	6.1642	0.0316153	6.14299	11.5137
7	120950749	120977216	ING3	ENSG00000071243	protein_coding	-1.19136	2.28277	0.0265384	0.543718	1.2446
7	983199	989640	CYP2W1	ENSG00000073067	protein_coding	-1.37393	1.21275	0.0327785	0.423037	1.10323
6	155395370	155455903	NOX3	ENSG00000074771	protein_coding	-2.31548	1.65784	0.000180546	0.478731	2.40616
2	209424058	209734118	MAP2	ENSG00000078018	protein_coding	-2.07606	2.19064	0.000283294	0.143772	0.609533
7	151238764	151277896	SMARCD3	ENSG00000082014	protein_coding	-0.871159	4.445	0.0471884	2.93383	5.36826
8	101492432	101669726	GRHL2	ENSG00000083307	protein_coding	-8.3928	1.14272	7.89453e-09	0	0.657808
1	119659798	119744215	PHGDH	ENSG00000092621	protein_coding	-0.829051	7.3214	0.0464935	20.466	36.3598
1	218346235	218444619	TGFB2	ENSG00000092969	protein_coding	-1.35931	3.29328	0.00472736	1.0438	2.68163
22	38078134	38084093	SLC16A8	ENSG00000100156	protein_coding	-1.7994	0.123747	0.0452022	0.177498	0.631219
20	34194569	34269344	ASIP	ENSG00000101440	protein_coding	-2.13786	0.35323	0.011803	0.502606	2.26401
18	48919853	48950711	SMAD7	ENSG00000101665	protein_coding	-2.15949	0.641396	0.00716778	0.13239	0.602633
8	66712418	66862022	SGK3	ENSG00000104205	protein_coding	-1.30924	1.55157	0.0361572	0.260381	0.648179
7	19695462	19709087	TWISTNB	ENSG00000105849	protein_coding	-0.854799	5.96336	0.0429832	11.0793	20.0393
7	116524785	116561184	CAV1	ENSG00000105974	protein_coding	-1.5969	5.00435	0.000266117	3.87962	11.7414
7	100612102	100615384	MOSPD3	ENSG00000106330	protein_coding	-1.13315	3.81819	0.0122515	5.04076	11.0645
9	114893343	114930595	TNFSF8	ENSG00000106952	protein_coding	-6.97376	-0.081438	0.000193974	0	0.51042
9	127866480	127877743	AK1	ENSG00000106992	protein_coding	-1.12993	2.3779	0.0318037	1.17293	2.57224
10	71212570	71302864	UNC5B	ENSG00000107731	protein_coding	-1.47855	1.9701	0.00926525	0.285797	0.799532
10	71747559	71773498	C10orf54	ENSG00000107738	protein_coding	-0.922531	3.69446	0.0463957	1.7157	3.25408
10	88935074	88991339	ACTA2	ENSG00000107796	protein_coding	-3.1694	0.296905	0.00108459	0.0656968	0.623018
10	101061841	101068131	KAZALD1	ENSG00000107821	protein_coding	-0.906197	4.92663	0.0362678	5.81725	10.905
11	68754620	68844410	CPT1A	ENSG00000110090	protein_coding	-0.877816	5.62781	0.0392111	5.28616	9.71532
6	125119049	125264407	TPD52L1	ENSG00000111907	protein_coding	-2.10637	3.75104	1.10896e-05	0.656431	2.83181
6	165279664	165309607	C6orf118	ENSG00000112539	protein_coding	-1.44169	0.884173	0.0428142	0.392773	1.07604
5	77210449	77429807	PDE8B	ENSG00000113231	protein_coding	-1.7202	2.75105	0.000799755	0.436414	1.44184
5	58969038	60522120	PDE4D	ENSG00000113448	protein_coding	-1.68772	5.08159	0.000127515	0.978408	3.15354
2	160099666	160271888	ITGB6	ENSG00000115221	protein_coding	-1.59049	2.46323	0.00259685	0.415201	1.25415
2	64988477	65023865	SLC1A4	ENSG00000115902	protein_coding	-0.96996	4.59801	0.0273614	2.33861	4.58248
1	43933320	43937241	ARTN	ENSG00000117407	protein_coding	-1.31806	1.37919	0.0319423	0.514896	1.29048
1	44819844	44843063	PTCH2	ENSG00000117425	protein_coding	-1.49814	1.18246	0.0216953	0.208841	0.594148
1	180230286	180278982	LHX4	ENSG00000121454	protein_coding	-1.13211	1.86448	0.0486862	0.354834	0.780063
6	116118923	116158747	COL10A1	ENSG00000123500	protein_coding	-3.51503	2.92168	6.24488e-10	0.307411	3.54689
20	43914864	44069616	TOX2	ENSG00000124191	protein_coding	-1.87441	2.56793	0.000385548	0.758275	2.79007
19	6583183	6604103	CD70	ENSG00000125726	protein_coding	-3.23395	-0.400052	0.0134121	0.0638099	0.665637
20	5544404	5611026	GPCPD1	ENSG00000125772	protein_coding	-0.941928	3.41033	0.0442064	0.948086	1.82282
19	49580646	49591015	PRRG2	ENSG00000126460	protein_coding	-2.70543	2.43221	2.67037e-06	0.804583	5.28653
19	18374731	18389176	GDF15	ENSG00000130513	protein_coding	-2.07717	3.64184	1.29579e-05	2.24836	9.50594
X	37349275	37457295	PRRG1	ENSG00000130962	protein_coding	-1.19885	1.84521	0.0380252	0.332183	0.765042
17	44959693	44968071	C1QL1	ENSG00000131094	protein_coding	-1.20744	1.64215	0.0472123	1.35878	3.14983
11	70078302	70189528	ANO1	ENSG00000131620	protein_coding	-2.0957	1.61528	0.000619733	0.178596	0.769848
17	34927859	34981078	CCT6B	ENSG00000132141	protein_coding	-1.0857	2.39128	0.0384283	0.744341	1.58287
20	9986126	10058303	ANKEF1	ENSG00000132623	protein_coding	-1.16497	2.16659	0.0341653	0.453901	1.02031
16	15703172	15857033	MYH11	ENSG00000133392	protein_coding	-1.05893	2.80577	0.0325499	0.273165	0.569908
11	34621093	34661057	EHF	ENSG00000135373	protein_coding	-1.67255	6.45676	9.44096e-05	9.53942	30.4156
11	34478793	34513805	ELF5	ENSG00000135374	protein_coding	-2.05139	0.988142	0.00406587	0.152269	0.639488
2	73290929	73293705	EGR4	ENSG00000135625	protein_coding	-1.49971	1.40409	0.014931	0.534639	1.52103
7	44000889	44010122	SPDYE1	ENSG00000136206	protein_coding	-1.58271	1.24072	0.0141787	0.405936	1.22487
9	34650702	34661892	IL11RA	ENSG00000137070	protein_coding	-1.55291	0.807997	0.0340354	0.183108	0.542643
15	66702228	66782848	SMAD6	ENSG00000137834	protein_coding	-1.0837	3.56076	0.0187627	0.86763	1.84046
15	45129933	45165576	DUOX1	ENSG00000137857	protein_coding	-1.21126	1.78717	0.0388178	0.222579	0.517139
4	76435100	76783253	SHROOM3	ENSG00000138771	protein_coding	-2.48776	4.85804	6.50602e-08	0.661171	3.71271
14	75427716	75474111	JDP2	ENSG00000140044	protein_coding	-1.13223	3.71843	0.0132605	1.30133	2.85475
17	76142453	76240373	RNF157	ENSG00000141576	protein_coding	-1.14871	5.32758	0.00750836	3.18255	7.05804
21	43414515	43427128	SIK1	ENSG00000142178	protein_coding	-1.42333	2.95926	0.00371992	0.840316	2.25786
4	83090048	83137075	PLAC8	ENSG00000145287	protein_coding	-1.09373	4.88141	0.0116851	4.84598	10.346
8	79918717	80030289	MRPS28	ENSG00000147586	protein_coding	-1.62339	1.68256	0.00533667	0.807018	2.50003
9	111896766	111935369	UGCG	ENSG00000148154	protein_coding	-0.887893	4.36112	0.0437561	3.09263	5.72502
11	1828307	1837521	SYT8	ENSG00000149043	protein_coding	-2.95708	1.49716	1.46563e-05	0.12469	0.985386
11	57484534	57515786	SLC43A1	ENSG00000149150	protein_coding	-1.01086	3.24713	0.0330521	1.74368	3.51712
2	46580937	46617119	PIGF	ENSG00000151665	protein_coding	-1.53612	1.42934	0.0123028	0.255291	0.744918
7	84995553	85186855	SEMA3D	ENSG00000153993	protein_coding	-2.21686	2.12938	0.000150551	0.181884	0.850927
9	41890314	42129510	CNTNAP3B	ENSG00000154529	protein_coding	-1.05475	3.13499	0.0288173	0.421493	0.876561
5	141853111	141879246	PCDH1	ENSG00000156453	protein_coding	-1.80227	5.54641	3.65998e-05	3.51083	12.2497
X	107713221	107777342	TSC22D3	ENSG00000157514	protein_coding	-1.26151	3.00359	0.00918536	0.96403	2.31471
11	46277661	46321422	CREB3L1	ENSG00000157613	protein_coding	-1.03786	3.67211	0.0235103	2.03408	4.17942
1	20588948	20618908	CDA	ENSG00000158825	protein_coding	-1.97064	4.92088	1.07916e-05	12.6891	49.77
15	42575659	42720981	STARD9	ENSG00000159433	protein_coding	-0.946283	4.46591	0.0310714	0.722341	1.39241
21	42199689	42297244	ABCG1	ENSG00000160179	protein_coding	-1.36184	3.13226	0.00441758	0.782565	2.01434
16	1078781	1080142	SSTR5	ENSG00000162009	protein_coding	-6.4384	-0.493994	0.00243493	0	0.748719
1	12567910	12617731	DHRS3	ENSG00000162496	protein_coding	-1.33597	2.89756	0.0067281	1.35237	3.41995
1	30732469	30757820	LAPTM5	ENSG00000162511	protein_coding	-5.66006	2.47527	2.28406e-13	0.059717	3.19966
1	228203506	228213664	C1orf145	ENSG00000162913	protein_coding	-1.71063	0.553057	0.0254753	0.160828	0.53381
2	203867786	203873960	CTLA4	ENSG00000163599	protein_coding	-1.74701	0.354371	0.0333763	0.230558	0.787119
5	76615482	76623434	F2RL2	ENSG00000164220	protein_coding	-1.78513	2.19232	0.00146	0.570177	1.9736
5	95713522	95824383	RHOBTB3	ENSG00000164292	protein_coding	-0.938975	3.657	0.040307	0.962848	1.84717
7	155799986	155812273	SHH	ENSG00000164690	protein_coding	-1.04906	5.76871	0.0137447	7.02421	14.5369
7	94394561	94431232	COL1A2	ENSG00000164692	protein_coding	-1.4495	8.72935	0.000552876	20.3821	55.6679
X	101882288	101932031	ZMAT1	ENSG00000166432	protein_coding	-1.14294	2.42922	0.0283755	0.429328	0.949999
2	188974320	189012746	COL3A1	ENSG00000168542	protein_coding	-0.963917	6.89542	0.0212471	11.72	22.8627
8	66460003	66518524	C8orf46	ENSG00000169085	protein_coding	-1.00953	3.26849	0.0327581	1.07721	2.17078
7	23597379	23644708	CCDC126	ENSG00000169193	protein_coding	-1.3564	1.40489	0.0265521	0.38552	0.992336
16	30192934	30194306	BOLA2B	ENSG00000169627	protein_coding	-1.7994	0.123747	0.0452022	0.286467	1.01874
12	52249300	52309163	KRT86	ENSG00000170442	protein_coding	-2.11611	2.05047	0.000334323	0.612511	2.67195
8	10672637	10700593	C8orf74	ENSG00000171060	protein_coding	-1.37615	1.59683	0.0260503	0.292575	0.763005
11	69294138	69367726	MYEOV	ENSG00000172927	protein_coding	-0.971501	3.41004	0.038083	1.87194	3.67369
4	7040849	7042939	CCDC96	ENSG00000173013	protein_coding	-2.10164	-0.00773866	0.0303481	0.140254	0.620694
3	157543246	157677749	PQLC2L	ENSG00000174899	protein_coding	-1.25956	1.24242	0.0475441	0.399635	0.962034
14	64939152	64942905	GPX2	ENSG00000176153	protein_coding	-1.56716	0.457698	0.0451175	0.391288	1.17505
16	86576368	86582160	FOXL1	ENSG00000176678	protein_coding	-1.60921	0.846095	0.0264977	0.208994	0.644129
2	24115371	24123477	PFN4	ENSG00000176732	protein_coding	-5.79579	-0.939119	0.0226768	0	0.614522
19	41425359	41428730	B3GNT8	ENSG00000177191	protein_coding	-3.23395	-0.400052	0.0134121	0.0521648	0.54416
1	64203627	64267368	UBE2U	ENSG00000177414	protein_coding	-1.99574	-0.0776177	0.0439913	0.159559	0.655694
12	49346917	49357546	DNAJC22	ENSG00000178401	protein_coding	-1.06543	2.57396	0.0355589	0.742061	1.55558
14	64465499	64474503	AKAP5	ENSG00000179841	protein_coding	-1.01171	3.93068	0.0259226	1.32737	2.67798
22	42079691	42084284	SMDT1	ENSG00000183172	protein_coding	-1.06514	3.47178	0.0222173	4.06614	8.51537
21	41361943	41409390	MX2	ENSG00000183486	protein_coding	-1.05544	3.74985	0.0202045	0.659354	1.37136
4	3766348	3768526	ADRA2C	ENSG00000184160	protein_coding	-0.910452	5.33358	0.0337113	12.786	24.0378
12	7689782	7695776	GDF3	ENSG00000184344	protein_coding	-2.73879	1.52155	3.64545e-05	0.552298	3.74113
11	95976598	96343180	MAML2	ENSG00000184384	protein_coding	-2.20971	1.82033	0.000192772	0.165014	0.769391
11	787104	790123	CEND1	ENSG00000184524	protein_coding	-1.30752	1.91827	0.0218534	1.24493	3.09204
7	110663051	111562517	IMMP2L	ENSG00000184903	protein_coding	-1.177	1.95471	0.0365821	0.659163	1.4948
1	63774022	64181498	ROR1	ENSG00000185483	protein_coding	-1.57877	3.68832	0.00072364	0.946268	2.83016
14	51826195	51979342	GNG2	ENSG00000186469	protein_coding	-2.82264	1.59019	1.83216e-05	0.107273	0.770241
X	119758613	119760164	SOWAHD	ENSG00000187808	protein_coding	-2.55285	-0.152386	0.0178622	0.125975	0.776525
3	188947214	189325304	TPRG1	ENSG00000188001	protein_coding	-0.97179	5.33289	0.0236281	2.83992	5.57106
20	59933764	59948680	FAM217B	ENSG00000196227	protein_coding	-0.987334	3.8577	0.0298194	1.79977	3.57027
9	96897917	97013708	MFSD14C	ENSG00000196312	protein_coding	-0.874672	4.41014	0.0471057	4.26004	7.81402
1	209614870	209652466	LAMB3	ENSG00000196878	protein_coding	-2.74457	0.804021	0.000636793	0.0823388	0.566108
12	53990624	54030823	HOXC6	ENSG00000197757	protein_coding	-1.28409	1.15329	0.0490282	0.331379	0.811824
19	34734155	34745378	ZNF181	ENSG00000197841	protein_coding	-1.06907	2.53923	0.0360754	0.577242	1.21318
12	52285913	52291534	KRT81	ENSG00000205426	protein_coding	-2.20484	2.82623	2.5269e-05	1.26694	5.86315
14	80197527	80387757	DIO2	ENSG00000211448	protein_coding	-2.94887	1.87374	3.38582e-06	0.104357	0.816458
7	151048292	151052756	ASIC3	ENSG00000213199	protein_coding	-1.39375	1.43013	0.0220647	0.498033	1.31568
2	97664217	97703064	LINC01125	ENSG00000228486	protein_coding	-1.82805	1.63853	0.00218391	0.195483	0.698746
10	124445239	124450184	NKX1-2	ENSG00000229544	protein_coding	-1.50301	2.05408	0.00825456	0.610253	1.73615
10	130063900	130110817	LINC00959	ENSG00000237489	protein_coding	-1.84111	0.642444	0.0191374	0.176297	0.640883
6	7881517	7910814	TXNDC5	ENSG00000239264	protein_coding	-1.19491	5.5348	0.00532174	6.3953	14.6443
7	100200653	100272218	GATS	ENSG00000239521	protein_coding	-1.40156	2.42722	0.00776662	0.583322	1.54508
22	39040961	39087743	APOBEC3G	ENSG00000239713	protein_coding	-3.01352	1.54405	9.10742e-06	0.107543	0.883877
11	5225464	5229395	HBB	ENSG00000244734	protein_coding	-1.34308	1.57438	0.0306957	1.32664	3.3811
5	141360042	141512979	PCDHGB2	ENSG00000253910	protein_coding	-1.32971	1.18333	0.0401014	0.245981	0.622051
1	203796309	203800558	ZBED6	ENSG00000257315	protein_coding	-1.00924	4.51667	0.0211043	3.54225	7.13284
16	67929614	67936017	CTC-479C5.12	ENSG00000261884	protein_coding	-1.09585	2.12092	0.0484199	0.46428	0.994725
7	128866308	128872044	RP11-309L24.4	ENSG00000272899	protein_coding	-1.44169	0.884173	0.0428142	0.225477	0.617717
9	92227001	92227375	AL136097.1	ENSG00000279007	protein_coding	-2.3144	-0.311786	0.041032	0.521369	2.71935
